# Supplementary material
Source: PubMed Central journal article supplement (PMC1084028)
Supplement: embor348-s1.pdf [file embor348-s1.pdf]

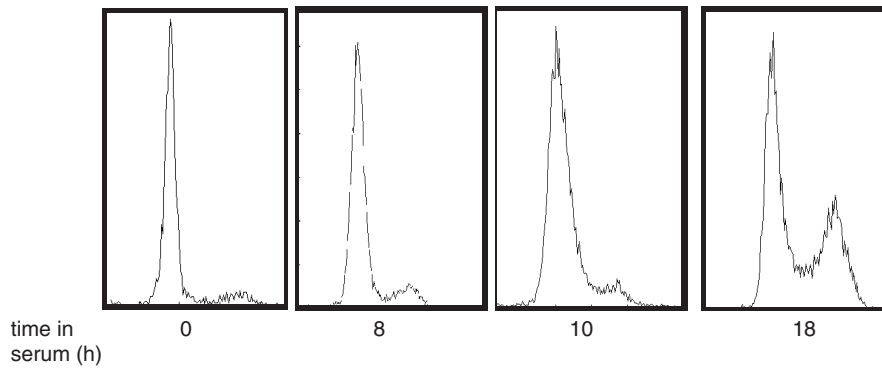

**Data not Shown.** Cell cycle analysis. NIH 3T3 cells were synchronized by serum deprivation and treated with serum for the indicated periods of time. Cell cycle was determined by flow cytometry using propidium iodide.
