# Supplementary material
Source: PubMed Central journal article supplement (PMC1084028)
Supplement: embor348-s2.pdf [file embor348-s2.pdf]

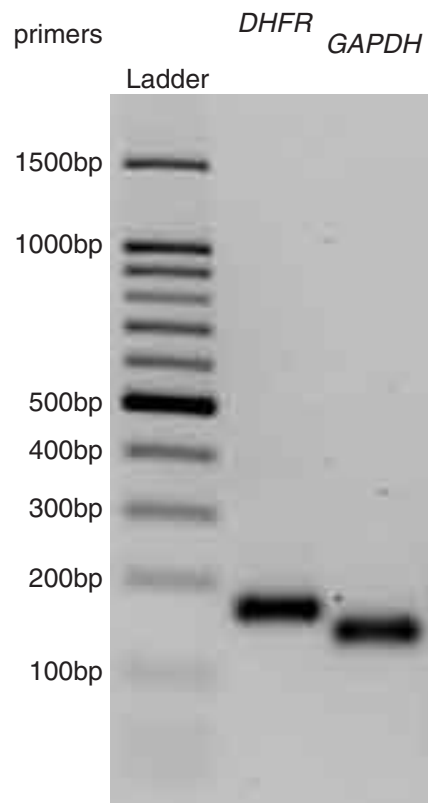

**Data not shown.** Electrophoretic analysis of PCR products using *DHFR* or *GAPDH* primers (2% agarose gel).
