# Supplementary material
Source: PubMed Central journal article supplement (PMC1084028)
Supplement: embor348-s3.pdf [file embor348-s3.pdf]

**A***DHFR*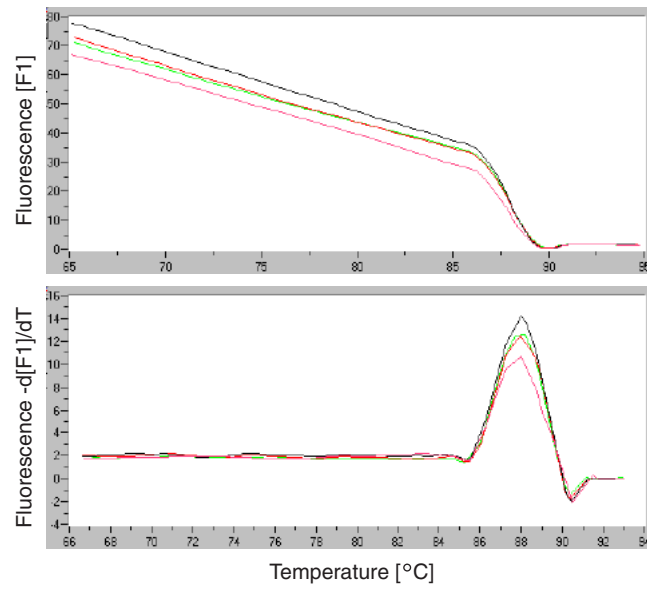**B***GAPDH*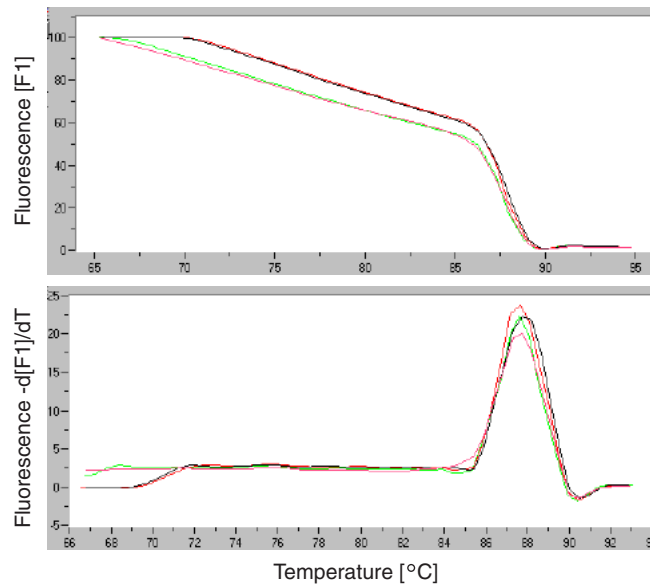

**Data not shown.** Melting curve analysis of PCR products using *DHFR* (A) or *GAPDH* (B) primers. Upper panels represent fluorescence corresponding to the PCR products as a function of the temperature; the inflexion point of the curves corresponds to the melting temperature of the products. Lower panels represent the first negative derivative of this melting curve. The peaks correspond to the inflexion point of the upper curves, permitting easy identification of the T<sub>m</sub> of the PCR products.
