# Supplementary material
Source: PubMed Central journal article supplement (PMC1084028)
Supplement: embor348-s4.pdf [file embor348-s4.pdf]

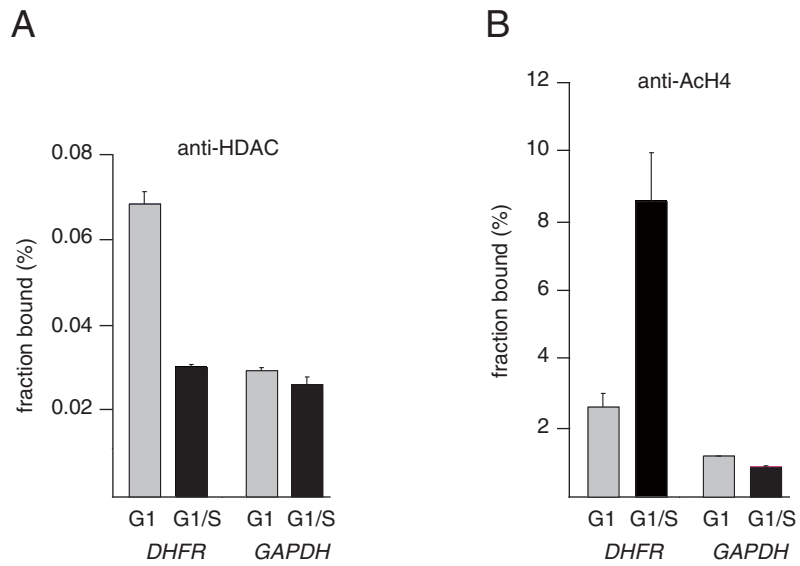

**Data not shown.** Chromatin from synchronized NIH 3T3 cells, either in G1 phase (gray bars) or at the G1/S transition (black bars), were analysed by XChIP procedure followed by quantitative PCR of eluted DNA. Equal amounts of chromatin were subjected to immunoprecipitation using anti-HDAC (H80920, Transduction Laboratories) (A) or anti-acetylated histone H4 (B) antibodies. *DHFR* or *GAPDH* sequences (as indicated) were detected by quantitative PCR. The results are expressed as fraction of the total number of copies detected as antibody-bound material.
